# Supplementary material
Source: PubMed Central journal article supplement (PMC3877927)
Supplement: NIHMS92719-supplement-Supplement_1.pdf [file NIHMS92719-supplement-Supplement_1.pdf]

**Editor's Note:** This online data supplement contains extended source material that was not included with the published article by Susmita Pati et al., "Generational Differences In U.S. Public Spending, 1980–2000," *Health Affairs*, 14 September 2004, online at [content.healthaffairs.org/cgi/content/abstract/23/5/xx](http://content.healthaffairs.org/cgi/content/abstract/23/5/xx)

## **Supplement 1. Data Sources**

### **Primary and Secondary Education**

Digest of Education Statistics 1001, Table 158: "Revenues for public elementary and secondary schools, by source of funds: 1919-20 to 1998-99." Available at <http://nces.ed.gov/pubs2002/digest2001/tables/dt157.asp>. Accessed November 16, 2002. Staff from the National Center for Education Statistics provided an updated Excel spreadsheet of this table with 1999-2000 data.

### **Temporary Assistance to Needy Families (TANF)/Aid to Families with Dependent Children (AFDC) and Emergency Assistance**

Social Security Bulletin Annual Statistical Supplement, Table 9.G1: "Average monthly number of recipients, total amount of cash payments, and average monthly payment, 1936-98." Staff from the Department of Health and Human Services provided an updated Excel spreadsheet of this table with 1998-2001 data.

### **Social Security**

Social Security Bulletin Annual Statistical Supplement, Table 4.A5: "Total annual benefits paid from OASI trust fund, by type of benefit, 1937-2000"; and 4.A6: "Total annual benefits paid from DI Trust Fund, by type of benefit, 1957-98". 2001 data for Table 4.A5 obtained at <http://www.ssa.gov/OACT/STATS/table4a5.html> and 1998-2000 data for Table 4.A6 obtained at <http://www.ssa.gov/OACT/STATS/table4a6.html>. Accessed November 11, 2002. Elders' portion includes payments to retired workers, their wives and husbands, surviving widowed mothers and fathers, widows and widowers, and parents and special beneficiaries. Children's portion includes payments to retired workers' children and surviving children.

### **Food Stamps**

Food Stamps data from 1997-2001 were obtained from Characteristics of Food Stamps Households 2001, Table 1 "Selected Characteristics of Participating Food Stamps Households, 2001" and similar tables in earlier volumes compiled by the United States Department of Agriculture. For 1986-1996, data were obtained from archived reports from staff at the United States Department of Agriculture. Prior to 1986, data were obtained from Current Population Reports, Series P-60 available at: <http://www.census.gov/prod/www/abs/income.html>. Accessed November 16, 2002. In this program, elders are considered those over the age of 60 and children are considered those less than 18.

### **Child Nutrition**

United States Department of Agriculture, Federal Cost of School Food Programs (1969-2002). Available at <http://www.fns.usda.gov/pd/cncosts.htm>. Accessed November 17, 2002. Includes National School Lunch, School Breakfast, and Special Milk Programs.

### **Medicaid**

Health Care Financing Review /2000 Statistical Supplement, Table 83: "Medicaid Payments, by Eligibility Group: Fiscal Years 1975-1998." Data for 1999 and 2000 obtained from Centers for Medicare and Medicaid Services available at <http://www.cms.hhs.gov/researchers/pubs/datacompendium/>. Accessed January 15, 2003.

### **Medicare**

Health Care Financing Review/1999 Statistical Supplement, Table 12: "Medicare Program Payments, by Type of Coverage and Type of Entitlement: Calendar Years 1967-1997." Data for 1998-2000 were obtained from the Statistical Abstract of the United States 2002.

### **State Child Health Insurance Program (SCHIP)**

Center for Medicare and Medicaid Services, "Net Reported Medicaid and SCHIP Expenditures." Available at <http://cms.hhs.gov/medicaid/mbes/ofs%2D21.asp>. Accessed January 16, 2003.

### **Maternal and Child Health Programs**

US Census Bureau, Statistical Abstract of the United States, line item for Maternal, child health programs, Tables labeled "National Health Expenditures by Type" (2001/Table No. 120, 1998/Table No. 164, 1995/Table No. 151, 1990/Table No. 135).

### **Child Welfare**

Budget of the United States government (each year from 1981-2001), Administration for Children and Families, Program identification code 75-1536-0-1-506, Line Items for 'Child welfare services' and 'Child welfare training'. Available at <http://www.access.gpo.usbudget/index.html>. Accessed November 20, 2002.

### **Women, Infants, and Children Program (WIC)**

United States Department of Agriculture, "WIC Program Participation and Costs (1974-2001)." Available at <http://www.fns.usda.gov/wic/AboutWIC>. Accessed November 21, 2002.

### **Veterans' Pension**

Veterans' Pension data were obtained from a combination of different sources. The Veterans Administration Office of Policy and Planning supplied the number of veterans receiving various types of pensions and the amount paid in pensions for each year from 1988-2002. Data for earlier years were calculated from data published in the Statistical Abstract of the US 1987. Table 548. Veterans' compensation and pension benefits-number on rolls and average payment, by period of service and status (similar table in

prior years) and the Social Security Bulletin Annual Statistical Supplement 2001. Table 9F1. Veterans' Benefits. Number of payments, by type of payment and age, 1940-2000.

### **Supplemental Security Insurance (SSI)**

2000 SSI Annual Report, Table IV.C2: "SSI Federal Payments in Current Dollars, Fiscal Years 1978-2000." Elders' portion includes spending on the "aged" only. Childrens' portion includes spending on "Blind or Disabled, age 0-17." Available at [www.ssa.gov/OACT/SSIR/SSI00/index.html](http://www.ssa.gov/OACT/SSIR/SSI00/index.html). Accessed November 12, 2002.

### **Older Americans Act**

Appropriations under the Older Americans Act were tracked by the United States House of Representatives Committee on Aging in the mid to late 1980s. This resulted in the publication of the serial volumes of Developments in Aging which included the following data: Developments in Aging 1986 Vol. I, Chapter 11, Table 11-1: "OAA Appropriations, 1980-87," and 1990 Vol. I, Chapter 13, Table 1: "OAA Authorization Levels, FY 1988-91." OAA expenditures for subsequent years were obtained from the Budget of the United States Government (1985-2001) under the sections for the Administration on Aging, Program identification code 75-0142-0-1-506 and for the Dept. of Labor "Community Service Employment for Older Americans" (ID code 16-0175-0-1-504, for OAA Title V Appropriations).

United States budget documents for years 1995-present are available at <http://www.access.gpo/usbudget/index.html>. Accessed January 10, 2003. Budget documents for prior years were obtained from the Van Pelt Library at the University of Pennsylvania, a Federal Depository Library.

### **Railroad Retirement**

Green Book 2000 (1950-1999). Available at

[http://www.house.gov/ways\\_means/publica.htm](http://www.house.gov/ways_means/publica.htm).

FY 2000 data from United States Railroad Retirement Budget Documents (available at: <http://www.rrb.gov/BFO/financialsttoc00.htm>). Accessed December 12, 2002.

### **Gross Domestic Product**

US Department of Commerce, Bureau of Economic Analysis, National Income and Product Accounts Tables. Available at

<http://www.bea.doc.gov/bea/dn/nipaweb/index.asp>. Accessed April 2, 2003.

### **Poverty**

U.S. Bureau of the Census. Children include related children younger than 18 years of age in families; elders included total persons aged 65 or older. Available at

<http://www.census.gov/hhes/poverty/histpov/hstpov3.html>. Accessed April 2, 2003.

### **Consumer Price Index**

U.S. Department of Labor, Bureau of Labor Statistics, Consumer Price Index for Urban Wage Earners and Clerical Workers, 1980-2001; and Consumer Price Index – Medical Component, 1980-2001. Available at [www.bls.gov](http://www.bls.gov). Accessed April 2, 2003.

### **Earned Income Tax Credit (EITC)**

Section 13 "Tax Provisions Related to Retirement, Health, Poverty, Employment, Disability and Other Social Issues." Green Book 2004. Available at <http://waysandmeans.house.gov>. Accessed June 15, 2004. The EITC is a refundable Federal income tax credit for low-income working individuals and families. Income and family size determine the amount of the EITC and modifications to the credit's unearned income tests in 1993 and 1996 led to large increases in the number of recipients and refunded amounts. According to studies conducted by the Internal Revenue Service, greater than 98% of EITC refunds in 1999 went to families. Refunded portions of the Earned Income Tax Credit are presented in the online Supplement 2. As estimating tax benefits to elders through programs such as tax-deferred retirement plans is not straightforward and requires complex statistical analyses relying on untested assumptions, these data are not presented and further research is needed in this area. To avoid bias in the comparability of social welfare spending on children and elders, EITC data were not included in this analysis.

**DISCLAIMER:** This material is presented to supplement the published paper by Pati and colleagues. Although the material presented here was part of the manuscript that was subjected to the scrutiny of the external reviewers, it has not been edited or formatted by the editors of *Health Affairs*; the authors are solely responsible for any errors herein.
