# Supplementary material
Source: PubMed Central journal article supplement (PMC3877927)
Supplement: NIHMS92719-supplement-Supplement_2.pdf [file NIHMS92719-supplement-Supplement_2.pdf]

**Editor's Note:** This online data supplement contains the complete data from Exhibit 4, which was not included with the published article by Susmita Pati et al., "Generational Differences In U.S. Public Spending, 1980–2000," Health Affairs, 14 September 2004, online at [content.healthaffairs.org/cgi/content/abstract/23/5/xx](http://content.healthaffairs.org/cgi/content/abstract/23/5/xx)

**Supplemental Exhibit 4. Spending on Social Welfare Programs for Children and Elders, 1980-2000.\* (millions of dollars)**

|                                                                           | 1980             | 1982             | 1984             | 1986             | 1988             | 1990             | 1992             | 1994             | 1996             | 1998             | 2000             |
|---------------------------------------------------------------------------|------------------|------------------|------------------|------------------|------------------|------------------|------------------|------------------|------------------|------------------|------------------|
| <b>CHILDREN</b>                                                           |                  |                  |                  |                  |                  |                  |                  |                  |                  |                  |                  |
| Primary and Secondary Education                                           | \$197,385        | \$192,067        | \$206,106        | \$231,931        | \$244,778        | \$273,052        | \$286,692        | \$301,792        | \$315,334        | \$344,702        | \$372,865        |
| TANF <sup>a</sup> /AFDC and Emergency Assistance                          | \$25,417         | \$22,447         | \$23,714         | \$24,935         | \$24,291         | \$24,964         | \$26,467         | \$26,480         | \$22,594         | \$13,670         | \$10,490         |
| Social Security, (OASI <sup>b</sup> for Dependent and Surviving children) | \$17,381         | \$16,432         | \$14,568         | \$14,011         | \$13,482         | \$12,936         | \$13,352         | \$13,839         | \$14,266         | \$14,675         | \$14,665         |
| Social Security, dependent benefits (DI) <sup>c</sup>                     | \$4,040          | \$3,268          | \$2,847          | \$2,939          | \$2,886          | \$2,827          | \$3,255          | \$3,977          | \$4,421          | \$4,494          | \$4,670          |
| Supplemental Security Insurance (SSI)                                     | \$758            | \$870            | \$961            | \$1,244          | \$1,457          | \$1,360          | \$3,280          | \$5,021          | \$4,979          | \$5,197          | \$4,866          |
| Food Stamps                                                               | \$12,659         | \$9,531          | \$10,183         | \$13,134         | \$12,646         | \$15,131         | \$20,822         | \$20,444         | \$19,576         | \$14,151         | \$11,106         |
| Child Nutrition                                                           | \$7,369          | \$5,714          | \$6,074          | \$6,156          | \$6,108          | \$5,825          | \$6,563          | \$6,952          | \$7,113          | \$7,529          | \$7,557          |
| Women, Infants, and Children (WIC)                                        | \$1,483          | \$1,654          | \$2,270          | \$2,462          | \$2,595          | \$2,779          | \$3,174          | \$3,677          | \$4,037          | \$4,114          | \$3,981          |
| Medicaid                                                                  | \$10,970         | \$9,973          | \$9,907          | \$11,192         | \$11,187         | \$14,863         | \$20,248         | \$21,599         | \$20,099         | \$22,060         | \$23,000         |
| SCHIP <sup>d</sup>                                                        | \$0              | \$0              | \$0              | \$0              | \$0              | \$0              | \$0              | \$0              | \$0              | \$190            | \$2,781          |
| Maternal and Child Health                                                 | \$1,817          | \$1,682          | \$1,753          | \$1,925          | \$2,445          | \$2,477          | \$2,574          | \$2,636          | \$2,480          | \$2,557          | \$2,654          |
| Child Welfare                                                             | \$1,630          | \$279            | \$270            | \$308            | \$346            | \$331            | \$335            | \$342            | \$304            | \$308            | \$292            |
| <b>Total social welfare for children</b>                                  | <b>\$280,909</b> | <b>\$263,916</b> | <b>\$276,899</b> | <b>\$310,238</b> | <b>\$322,219</b> | <b>\$356,545</b> | <b>\$386,759</b> | <b>\$406,757</b> | <b>\$415,205</b> | <b>\$433,648</b> | <b>\$458,927</b> |
| <b>Earned Income Tax Credit (EITC)<sup>e</sup></b>                        | <b>\$1,329</b>   | <b>\$1,185</b>   | <b>\$1,127</b>   | <b>\$1,435</b>   | <b>\$4,129</b>   | <b>\$5,108</b>   | <b>\$9,660</b>   | <b>\$16,100</b>  | <b>\$22,462</b>  | <b>\$26,360</b>  | <b>\$26,969</b>  |

**EXHIBIT 4. Spending on Social Welfare Programs for Children and Elders, 1980-2000. (continued)\***

|                                                   | 1980               | 1982               | 1984               | 1986               | 1988               | 1990               | 1992               | 1994               | 1996               | 1998               | 2000               |
|---------------------------------------------------|--------------------|--------------------|--------------------|--------------------|--------------------|--------------------|--------------------|--------------------|--------------------|--------------------|--------------------|
| <b>ELDERS</b>                                     |                    |                    |                    |                    |                    |                    |                    |                    |                    |                    |                    |
| Social Security (OASI) <sup>b</sup>               | \$195,889          | \$225,148          | \$243,196          | \$260,711          | \$268,473          | \$278,758          | \$297,969          | \$309,689          | \$317,491          | \$330,738          | \$337,827          |
| Social Security (DI) <sup>c</sup>                 | \$27,411           | \$26,953           | \$26,421           | \$27,926           | \$28,430           | \$29,648           | \$34,743           | \$39,777           | \$43,995           | \$46,454           | \$50,269           |
| Supplemental Security Insurance                   | \$3,694            | \$3,479            | \$3,277            | \$3,436            | \$3,492            | \$2,976            | \$3,604            | \$4,162            | \$3,636            | \$3,869            | \$3,775            |
| Railroad Retirement                               | \$9,638            | \$9,980            | \$9,973            | \$9,844            | \$9,637            | \$9,420            | \$9,403            | \$9,256            | \$8,893            | \$8,722            | \$8,303            |
| Veterans' Pension                                 | \$6,529            | \$6,937            | \$7,489            | \$6,154            | \$6,689            | \$7,112            | \$6,915            | \$6,734            | \$6,731            | \$6,873            | \$6,774            |
| Food Stamps                                       | \$1,738            | \$1,000            | \$937              | \$1,288            | \$1,113            | \$1,226            | \$1,548            | \$1,565            | \$1,529            | \$1,123            | \$1,092            |
| Medicare                                          | \$102,651          | \$119,991          | \$129,758          | \$132,536          | \$138,090          | \$146,376          | \$148,447          | \$159,433          | \$165,526          | \$197,953          | \$186,649          |
| Medicaid                                          | \$30,696           | \$30,837           | \$31,906           | \$32,904           | \$32,778           | \$35,129           | \$40,630           | \$41,967           | \$42,327           | \$43,780           | \$33,000           |
| Older Americans Act                               | \$2,023            | \$1,753            | \$1,838            | \$1,543            | \$2,220            | \$2,184            | \$1,519            | \$1,444            | \$1,315            | \$1,350            | \$1,284            |
| <b>Total social welfare for elders</b>            | <b>\$380,270</b>   | <b>\$426,077</b>   | <b>\$454,795</b>   | <b>\$476,342</b>   | <b>\$490,924</b>   | <b>\$512,828</b>   | <b>\$544,778</b>   | <b>\$574,027</b>   | <b>\$591,444</b>   | <b>\$640,861</b>   | <b>\$628,973</b>   |
| <b>Total social welfare-- children and elders</b> | <b>\$661,179</b>   | <b>\$689,993</b>   | <b>\$731,694</b>   | <b>\$786,579</b>   | <b>\$813,143</b>   | <b>\$869,373</b>   | <b>\$931,538</b>   | <b>\$980,785</b>   | <b>\$1,006,649</b> | <b>\$1,074,509</b> | <b>\$1,087,899</b> |
| <b>Gross Domestic Product</b>                     | <b>\$5,695,740</b> | <b>\$5,680,897</b> | <b>\$6,430,136</b> | <b>\$6,925,367</b> | <b>\$7,374,289</b> | <b>\$7,598,143</b> | <b>\$7,722,592</b> | <b>\$8,183,182</b> | <b>\$8,563,592</b> | <b>\$9,287,385</b> | <b>\$9,872,900</b> |

**SOURCE:** Data on primary and secondary education came from the 2001 Digest of Education Statistics and the National Center for Education Statistics. Data on TANF/AFDC, Social Security, SSI, and Veterans' Pensions were obtained from the Department of Health and Human Services, Social Security Administration and the Department of Veterans' Affairs. Railroad Retirement and Older Americans' Act data were obtained from the U.S. Railroad Retirement Board and volumes compiled for the U.S. House of Representatives Committee on Aging. Data on Food Stamps, WIC, and child nutrition came from the U.S. Department of Agriculture. Data on other maternal and child health programs and child welfare were obtained from the Department of Health and Human Services, Administration for Children and Families. Medicaid, SCHIP, and Medicare data were obtained from the Center for Medicaid and Medicare Services. Poverty and population data were obtained from the U.S. Bureau of the Census. CPI, Medical CPI, and GDP data were obtained from the Bureau of Labor Statistics. Earned Income Tax Credit data were obtained from the Internal Revenue Service. Full bibliographic information regarding data sources for authors' analyses is available through an online appendix, [content.healthaffairs.org/cgi/content/full/23/5/xx/DC1](http://content.healthaffairs.org/cgi/content/full/23/5/xx/DC1).

\* Spending is reported in 2000 constant dollars. Numbers may not add exactly to reported subtotals and totals due to rounding.

<sup>a</sup> AFDC refers to Aid to Families with Dependent Children. TANF refers to Temporary Assistance to Needy Families.

<sup>b</sup> OAS refers to the Old Age Survivors' Insurance.

<sup>c</sup> DI refers to Disability Insurance.

<sup>d</sup> SCHIP refers to the State Child Health Insurance Program.

<sup>e</sup> Refunded portions of the Earned Income Tax Credit are shown. As estimating tax benefits to elders through programs such as tax-deferred retirement plans is not straightforward and requires complex statistical analyses relying on untested assumptions, these data are not presented and further research is needed in this area. To avoid bias in the comparability of social welfare spending on children and elders, EITC data were not included in this analysis.

**DISCLAIMER:** This exhibit is presented to supplement the published paper by Pati and colleagues. Although the full exhibit presented here was part of the manuscript that was subjected to the scrutiny of the external reviewers, it has not been edited or formatted by the editors of *Health Affairs*; the authors are solely responsible for any errors herein.
